# Supplementary material for: Differential Serotonin Uptake Mechanisms at the Human Maternal–Fetal Interface
Source: MDPI journal article supplement (doi:10.3390/ijms22157807), 2021-07-21
Supplement: s1 [file s1]

## **SUPPLEMENTARY MATERIAL**

### **Differential serotonin uptake mechanisms at the human maternal-fetal interface**

Petra Baković<sup>&</sup>, Maja Kesić<sup>&</sup>, Maja Perić, Ivona Bečeheli, Marina Horvatiček, Meekha George,  
Lipa Čičin-Šain, Gernot Desoye, Christian Wadsack, Ute Panzenboeck<sup>#</sup>, Jasminka Štefulj<sup>\*</sup>

<sup>&</sup>PB and MK contributed equally to this work

<sup>#</sup>deceased

<sup>\*</sup>correspondence to: [jasminka.stefulj@irb.hr](mailto:jasminka.stefulj@irb.hr)

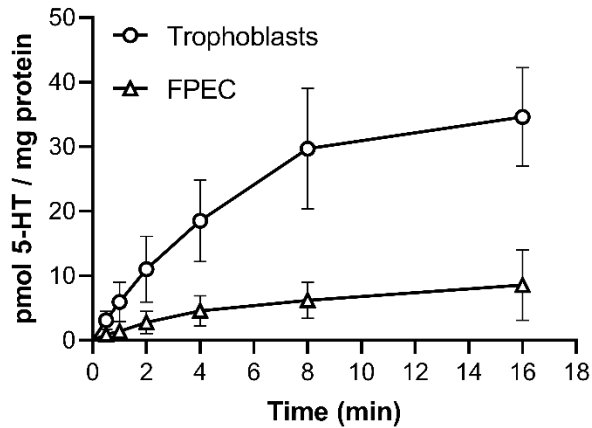

**Figure S1.** Time course of specific uptake of 5-HT into human primary trophoblasts and fetoplacental endothelial cells. Cells were incubated in the presence of  $^3\text{H}$ -5-HT ( $10^{-7}$  M) at  $37^\circ\text{C}$  or on ice for the indicated time. Specific uptake, calculated as the difference between transport at  $37^\circ\text{C}$  and on ice, is expressed per total cellular protein content. Values are means  $\pm$  SD from two different donors, each analyzed in triplicate. Under the conditions used ( $10^{-7}$  M 5-HT), the specific uptake of 5-HT was significantly higher (up to 5-fold) in trophoblasts than in fetoplacental endothelial cells ( $p < 0.0001$ , 2-way ANOVA).

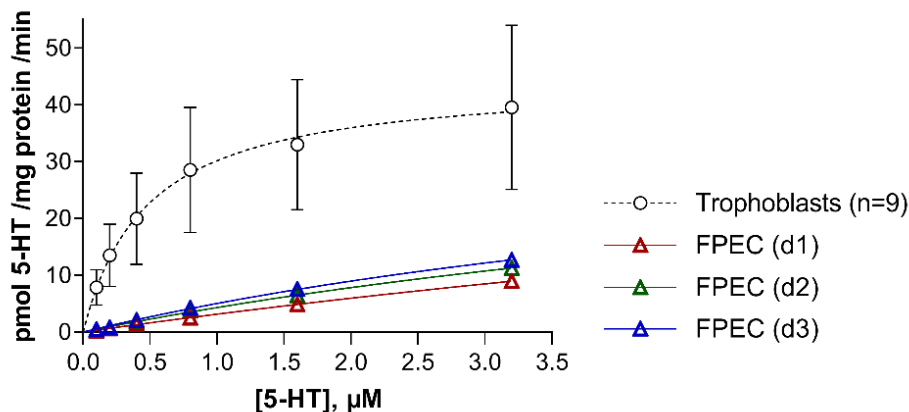

**Figure S2.** Uptake of 5-HT into fetoplacental endothelial cells (FPEC), measured over the high-affinity range of 5-HT concentrations (0.1 to  $3.2 \mu\text{M}$ ). Specific transport was calculated as the difference between transport at  $37^\circ\text{C}$  and on ice. Shown are FPEC from three different donors (d), each analyzed in triplicates. For comparison, a curve based on the mean values of trophoblasts from 9 different donors (mean  $\pm$  SEM), each analyzed in triplicates, is included in the graph (dashed line). The rates of specific 5-HT uptake in FPEC were not only greatly reduced compared to trophoblasts, but also did not show clear saturation kinetics within the high-affinity range of 5-HT concentrations, preventing estimation of kinetic parameters with acceptable accuracy and indicating the lack of a functional high-affinity uptake system as observed in trophoblasts.

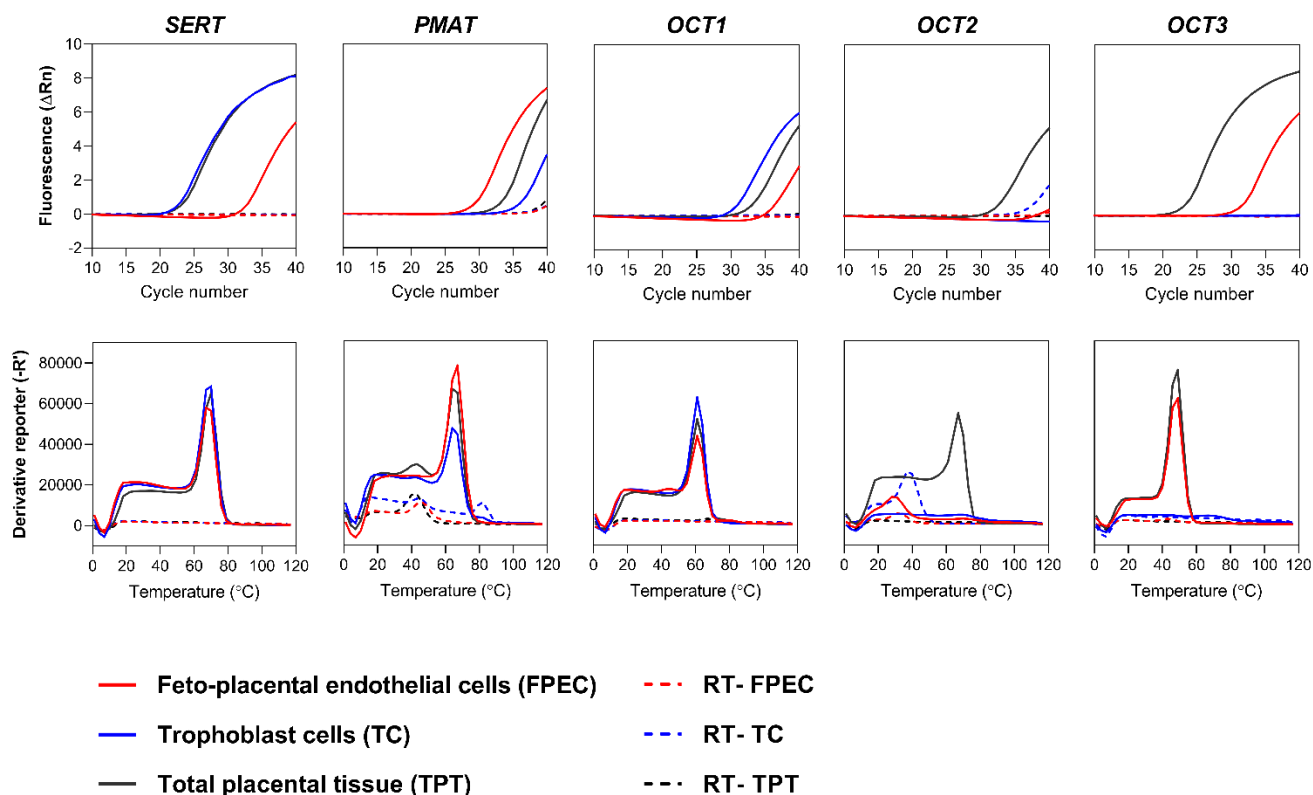

**Figure S3.** Reverse transcription - real-time quantitative PCR (RT-qPCR) analysis of serotonin transporter (*SERT*), plasma membrane monoamine transporter (*PMAT*), organic cation 1 (*OCT1*), 2 (*OCT2*) and 3 (*OCT3*) mRNAs in pooled samples of human primary trophoblasts (n=9) and feto-placental endothelial cells (n=12). Total placental tissue (a pool of 20 donors) served as a positive control. Amplification curves (top row) and melting curves (bottom row) are shown. Amplification curves show the increase in fluorescence (baseline-corrected normalized reporter;  $\Delta R_n$ ) against the number of cycles. Melting curves showing the specificity of the amplified products are plotted as derivative reporter (the negative first-derivative of the normalized fluorescence generated by the reporter;  $-R'$ ) versus temperature ( $^{\circ}\text{C}$ ). RT- FPEC, RT- TC, and RT- TPT - control reaction without reverse transcriptase, prepared with RNA from feto-placental endothelial cells, trophoblast cells, and total placental tissue, respectively.

**Table S1.** Kinetic parameters of 5-HT uptake in human primary trophoblasts, feto-placental endothelial cells, and cord blood platelets. Means  $\pm$  SD or medians with interquartile range (IQR, in parentheses) are given for data with normal and non-normal distributions, respectively. Data for trophoblasts and feto-placental endothelial cells are from Figure 2C and for cord blood platelets from Figure 5B. *K<sub>m</sub>* - Michaelis affinity constant, *V<sub>max</sub>* - maximal transport velocity, n - number of participants analyzed.

| Cells                            | n | <i>K<sub>m</sub></i> ( $\mu$ mol /L) | <i>V<sub>max</sub></i> (pmol /mg protein /min) |
|----------------------------------|---|--------------------------------------|------------------------------------------------|
| Trophoblasts                     | 9 | 0.64 $\pm$ 0.27                      | 25 (20 - 68)                                   |
| Feto-placental endothelial cells | 9 | 782 $\pm$ 218                        | 1005 $\pm$ 251                                 |
| Cord blood platelets             | 9 | 0.65 $\pm$ 0.18                      | 878 $\pm$ 286                                  |

**Table S2.** Quantification cycle (C<sub>q</sub>) values obtained in reverse transcription - quantitative real-time PCR (RT-qPCR) analysis of individual trophoblast and feto-placental endothelial cell samples. n, number of samples analyzed; +, number of samples in which a specific signal was detected; n.a., not applicable.

| Gene        | Trophoblasts<br>(n = 9) |                               | Feto-placental endothelial cells<br>(n = 12) |                               |
|-------------|-------------------------|-------------------------------|----------------------------------------------|-------------------------------|
|             | +/n                     | C <sub>q</sub> , mean (range) | +/n                                          | C <sub>q</sub> , mean (range) |
| <i>SERT</i> | 9/9                     | 19.8 (18.2-20.9)              | 12/12                                        | 31.2 (26.8-36.7)              |
| <i>PMAT</i> | 9/9                     | 33.0 (31.1-35.1)              | 12/12                                        | 25.0 (23.2-26.5)              |
| <i>OCT1</i> | 9/9                     | 31.7 (29.9-33.8)              | 9/12                                         | 35.1 (34.1-36.7)              |
| <i>OCT2</i> | 0/9                     | n.a.                          | 0/12                                         | n.a.                          |
| <i>OCT3</i> | 3/9                     | 35.5 (34.3-37.1)              | 5/12                                         | 32.2 (28.4-35.1)              |
| <i>MAOA</i> | 9/9                     | 21.2 (18.6-23.1)              | 12/12                                        | 23.3 (22.3-24.7)              |
| <i>ACTB</i> | 9/9                     | 14.2 (12.5-15.1)              | 12/12                                        | 13.8 (13.2-15.5)              |

**Table S3.** Characteristics of participants who donated tissue for trophoblast, feto-placental endothelial cell, and cord blood platelet isolation for the study. Continuous variables are shown as mean  $\pm$  SD.

| Characteristic                | Trophoblasts    | Feto-placental endothelial cells | Cord blood platelets |
|-------------------------------|-----------------|----------------------------------|----------------------|
| Number of participants        | 16 <sup>a</sup> | 21 <sup>b</sup>                  | 9                    |
| Labor (vaginal : Cesarean)    | 5 : 11          | 10 : 11                          | 0 : 9                |
| Newborn's sex (male : female) | 10 : 6          | 10 : 11                          | 4 : 5                |
| Maternal age (years)          | 29.4 $\pm$ 6.5  | 31.5 $\pm$ 5.2                   | 32.8 $\pm$ 5.1       |
| Gestational age (weeks)       | 39.5 $\pm$ 1.2  | 38.8 $\pm$ 1.1                   | 39.1 $\pm$ 0.7       |
| Birth weight (g)              | 3462 $\pm$ 447  | 3228 $\pm$ 430                   | 3653 $\pm$ 616       |
| Birth length (cm)             | 50.5 $\pm$ 2.3  | 49.6 $\pm$ 1.7                   | 50.7 $\pm$ 2.3       |

<sup>a</sup> Donors included in time-course (n=2), kinetic (n=9), pharmacological (n=8), and mRNA (n=9) experiments partially overlapped.

<sup>b</sup> Donors included in time-course (n=2), kinetic (n=12), citalopram (n=2), and mRNA (n=12) experiments partially overlapped.

**Table S4.** Sequences of gene-specific primers used in qualitative end-point and quantitative real-time PCR analyses (f - forward, r – reverse).

| Gene symbol           | Gene name                             | Primer sequence (5' - 3')                             | Amplicon (bp)      | Source           |
|-----------------------|---------------------------------------|-------------------------------------------------------|--------------------|------------------|
| <i>SERT / SLC6A4</i>  | serotonin transporter                 | f: TGGTTCTATGGCATCACTCAGTTC<br>r: GTTGTGGCGGGCTCATCAG | 148 <sup>a,b</sup> | [1]              |
| <i>PMAT / SLC29A4</i> | plasma membrane monoamine transporter | f: TTTTATCAGCATCTGCGACG<br>r: CCCACGAAGTCTGACAGGTT    | 762 <sup>a</sup>   | [2]              |
| <i>PMAT / SLC29A4</i> | plasma membrane monoamine transporter | f: CTGTCCTCCTGAACAACGTCC<br>r: ACACGTCGCAGATGCTGATAA  | 111 <sup>b</sup>   | [3] <sup>c</sup> |
| <i>OCT1 / SLC22A1</i> | organic cation transporter 1          | f: CTGTGTAGACCCCCTGGCTA<br>r: GTGTAGCCAGCCATCCAGTT    | 363 <sup>a</sup>   | [4]              |
| <i>OCT1 / SLC22A1</i> | organic cation transporter 1          | f: GACGCCGAGAACCCTTGGG<br>r: GGGTAGGCAAGTATGAGG       | 198 <sup>b</sup>   | [5]              |
| <i>OCT2 / SLC22A2</i> | organic cation transporter 2          | f: CCTGGTATGTGCCAACTCCT<br>r: CACCAGGAGCCCAACTGTAT    | 334 <sup>a</sup>   | [4]              |
| <i>OCT2 / SLC22A2</i> | organic cation transporter 2          | f: CGGAGATATCGGAGAACAGT<br>r: GCATTCTTATTCTGGGAGATC   | 200 <sup>b</sup>   | [5]              |
| <i>OCT3 / SLC22A3</i> | organic cation transporter 3          | f: CAGAGATCACTGTTACAGAT<br>r: GATAGCTCCTTCTTTCTGTC    | 734 <sup>a</sup>   | [6]              |
| <i>OCT3 / SLC22A3</i> | organic cation transporter 3          | f: GAGGACCACAGTGGCTACAT<br>r: ACAGACCTGAACAGAGCGAA    | 128 <sup>b</sup>   | [7]              |
| <i>MAOA</i>           | monoamine oxidase A                   | f: GAGCGGCTACATGGAAGGG<br>r: TCACCTTCCCGAGACCATTTA    | 77 <sup>a,b</sup>  | [8]              |
| <i>ACTB</i>           | actin beta                            | f: TCCCTGGAGAAGAGCTACG<br>r: GTAGTTTCGTGGATGCCACA     | 131 <sup>a,b</sup> | [9]              |

<sup>a</sup> primers used in conventional end-point PCR analysis

<sup>b</sup> primers used in real-time PCR analysis

<sup>c</sup> PrimerBank ID: 100913033c2

### Supplementary References

1. Van Lelyveld, N.; Ter Linde, J.; Schipper, M.E.I.; Samsom, M. Regional differences in expression of TPH-1, SERT, 5-HT<sub>3</sub> and 5-HT<sub>4</sub> receptors in the human stomach and duodenum. *Neurogastroenterol. Motil.* **2007**, *19*, 342–348
2. Naganuma, F.; Yoshikawa, T.; Nakamura, T.; Iida, T.; Harada, R.; Mohsen, A.S.; Miura, Y.; Yanai, K. Predominant role of plasma membrane monoamine transporters in monoamine transport in 1321N1, a

human astrocytoma-derived cell line. *J. Neurochem.* **2014**, *129*, 591–601.

3. Spandidos, A.; Wang, X.; Wang, H.; Seed, B. PrimerBank: A resource of human and mouse PCR primer pairs for gene expression detection and quantification. *Nucleic Acids Res.* **2009**, *38*, 792–799.
4. Li, R.W.S.; Yang, C.; Kwan, Y.W.; Chan, S.W.; Lee, S.M.Y.; Leung, G.P.H.; Luo, J.-D. Involvement of organic cation transporter-3 and plasma membrane monoamine transporter in serotonin uptake in human brain vascular smooth muscle cells. **2013**, *4*.
5. Hayer-Zillgen, M.; Brüss, M.; Bönisch, H. Expression and pharmacological profile of the human organic cation transporters hOCT1, hOCT2 and hOCT3. *Br J Pharmacol.* **2002**, *136*(6), 829-836.
6. Sata, R.; Ohtani, H.; Tsujimoto, M.; Murakami, H.; Koyabu, N.; Nakamura, T.; Uchiumi, T.; Kuwano, M.; Nagata, H.; Tsukimori, K.; Nakano, H.; Sawada, Y. Functional analysis of organic cation transporter 3 expressed in human placenta. *J Pharmacol Exp Ther.* **2005**, *315*(2), 888-895.
7. Real-time PCR (TaqMan) primer and probes design tool. Available online: <https://www.genscript.com/tools/real-time-pcr-taqman-primer-design-tool> (accessed on 11.3.2021.).
8. Sun, Y.; Zhang, J.; Yuan, Y.; Yu, X.; Shen, Y.; Xu, Q. Study of a possible role of the monoamine oxidase A (MAOA) gene in paranoid schizophrenia among a Chinese population. *Am. J. Med. Genet. Part B Neuropsychiatr. Genet.* **2012**, *159 B*, 104–111.
9. Métayé, T.; Menet, E.; Guilhot, J.; Kraimps, J.-L. Expression and Activity of G Protein-Coupled Receptor Kinases in Differentiated Thyroid Carcinoma. *J. Clin. Endocrinol. Metab.* **2002**, *87*, 3279–3286.
